# Supplementary material for: Enhanced electromagnetic wave absorption performance of novel carbon-coated Fe3Si nanoparticles in an amorphous SiCO ceramic matrix
Source: Royal Society of Chemistry journal article supplement (doi:10.1039/c8tc01769g), 2018-01-01
Supplement: c8tc01769g1.pdf [file c8tc01769g1.pdf]

## Support information

### Enhanced electromagnetic wave absorption performance of a novel carbon-coated Fe<sub>3</sub>Si nanoparticles in the amorphous SiCO ceramics matrix

*Yongzhao Hou<sup>a</sup>, Bo Xiao<sup>b</sup>, Guowei Yang<sup>b</sup>, Zhiyuan Sun<sup>b</sup>, Wen Yang<sup>c</sup>, Songsong Wu<sup>a</sup>, Xiaoxiao Huang<sup>a</sup>, Guangwu Wen<sup>a, b, d, \*</sup>*

<sup>a</sup> School of Materials Science and Engineering, Harbin Institute of Technology, Harbin 150001, China.

<sup>b</sup> School of Materials Science and Engineering, Shandong University of Technology, Zibo 255000, China.

<sup>c</sup> Center for Composite Materials, Harbin Institute of Technology, Harbin 150001, China.

<sup>d</sup> Shandong Industrial Ceramics Research & Design Institute Co., Ltd., Zibo 255000, China

\*Corresponding author E-mail address: g\_wen2016@163.com (G.W. Wen)

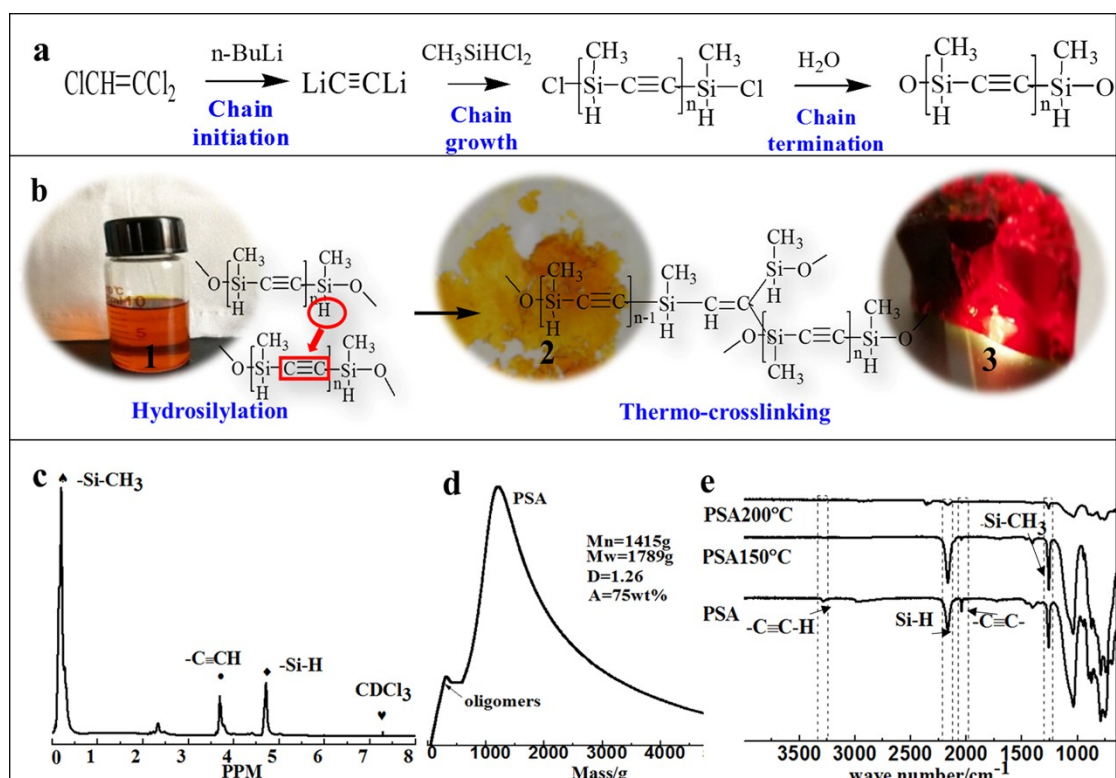

Fig S1. The detailed synthetic process and characterizations of PSA. (a) the synthetic process, (b) the crosslinking process, (c) H-NMR, (d) GPC, (e) FTIR.

The synthesis of PSA is mainly based on the dechlorination between  $\text{LiC}\equiv\text{CLi}$  and  $\text{CH}_3\text{SiHCl}_2$ . The reaction formula of PSA is described in Fig S1a. Obviously, ideal PSA precursor is a macromolecular weight polymer with the repetitive element  $-\text{Si}-\text{C}\equiv\text{C}-$  bond. Due to the high activity of the  $-\text{Si}-\text{H}$  bond and the  $-\text{C}\equiv\text{C}-$  bond, the thermo-crosslinking could take place by the hydrosilylation in Fig S1b. As shown in Fig S1c, the peak at 4.6 ppm in H-NMR is from the  $-\text{Si}-\text{H}$  bond, while the peak at 0.4~0.7 ppm is attributed to the  $-\text{Si}-\text{CH}_3$  bond. GPC analysis demonstrates the molecular weight distribution of the PSA. As shown in Fig S1d, the  $M_n$  of the PSA resin is about 1415 g/mol,  $M_w$  is about 1789 g/mol, and the ID (index of polydispersity) is 1.26. As for the PSA, there are three typical peaks shown in the Fig S1e, the peak at  $2165\text{ cm}^{-1}$  is attributed to the  $-\text{Si}-\text{H}$  bond, the peak at  $2045\text{ cm}^{-1}$  is on account of  $-\text{C}\equiv\text{C}-$  bond stretching vibration, and  $1260\text{ cm}^{-1}$  is due to  $\text{Si}-\text{CH}_3$  vibration.

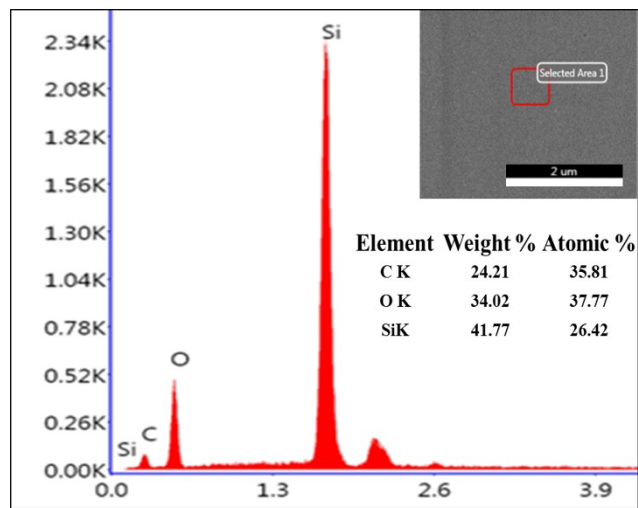

Fig S2. The EDX patterns of the PSA at 1000°C

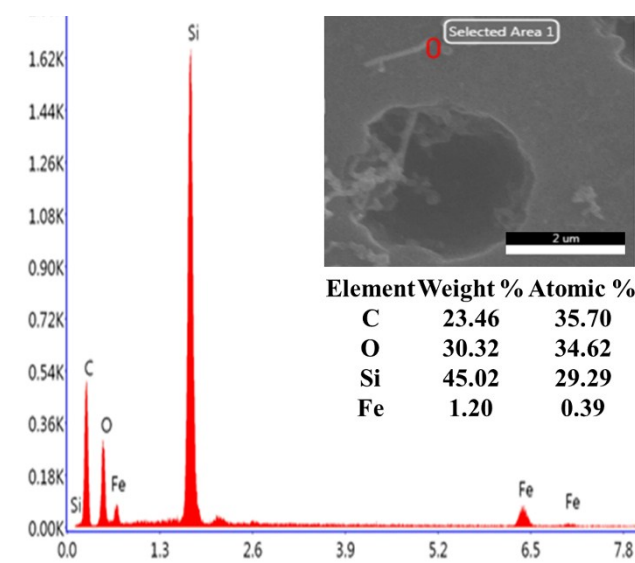

Fig S3. The EDX patterns of the sample Fe-1.

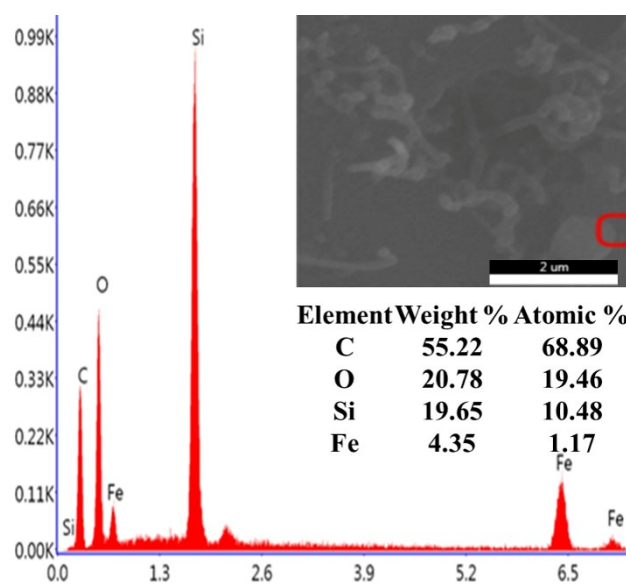

Fig S4. The EDX patterns of the sample Fe-2.

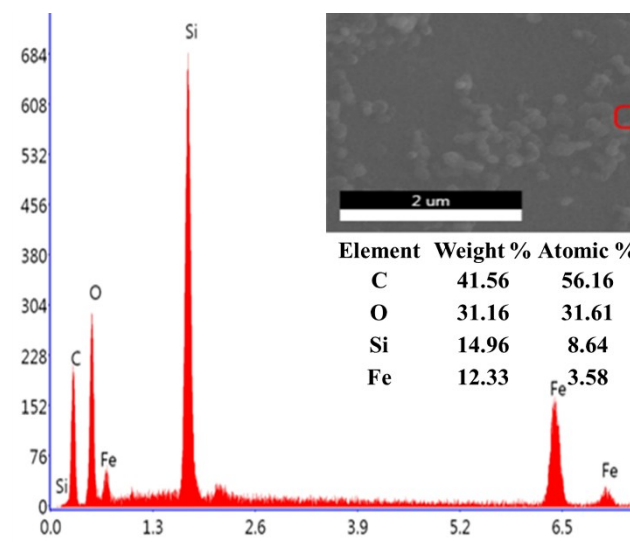

Fig S5. The EDX patterns of the sample Fe-3.

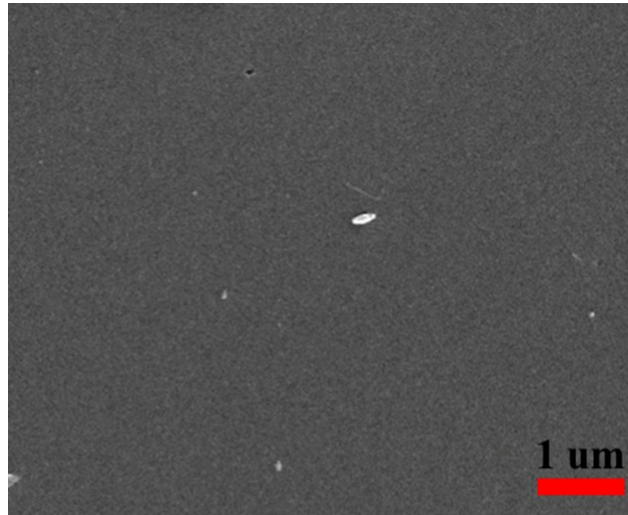

Fig S6. SEM of PSA at 1000°C.

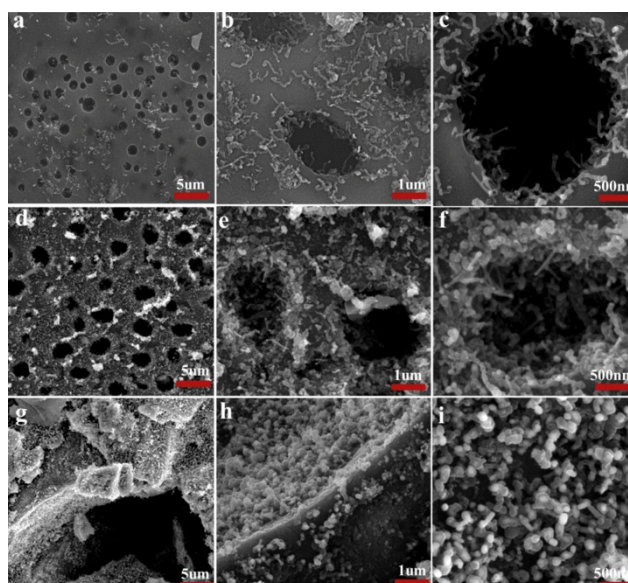

Fig.S7. SEM of samples. (a, b, and c) Fe-1, (d, e, and f) Fe-2, (g, h, and i) Fe-3.

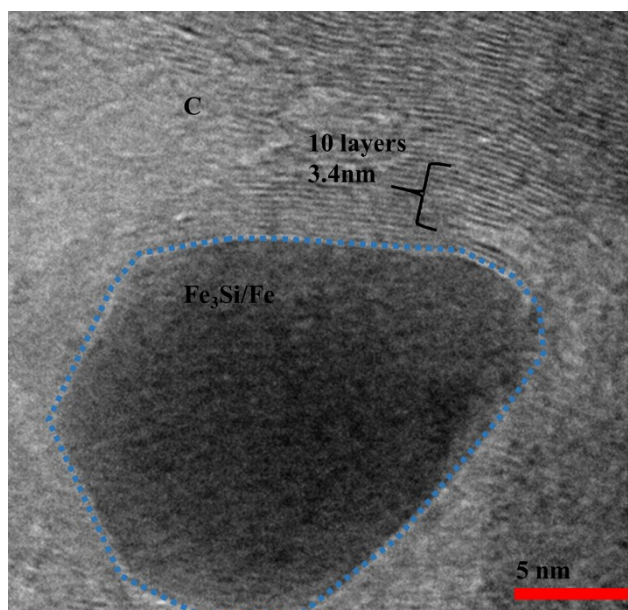

Fig S8. TEM of the single carbon sphere.

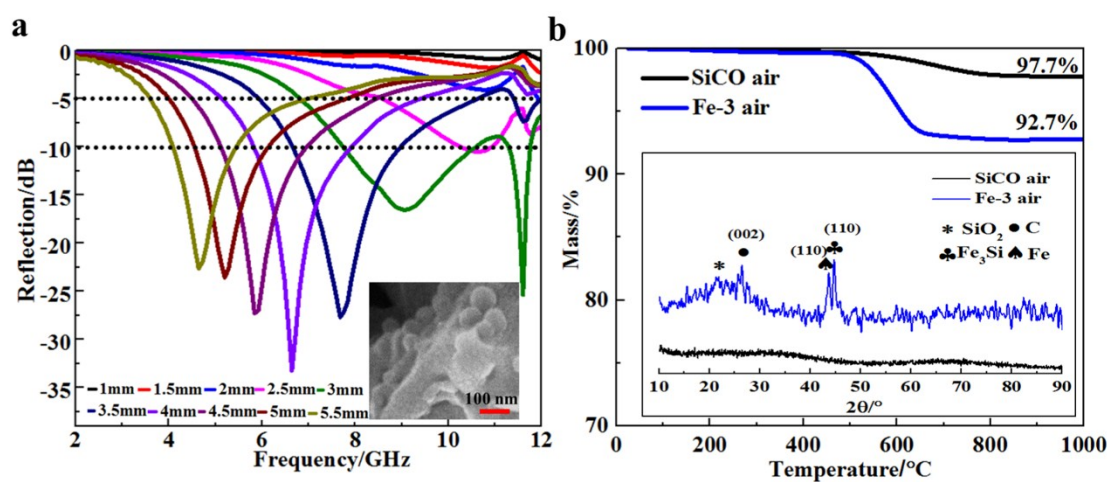

Fig S9. The high temperature stability of Fe-3. (a) the reflection loss and the morphology of the sample Fe-3, (b) the TG curves and XRD patterns of Fe-3.
